# Supplementary material for: Low-cost and high-performance of a vertically grown 3D Ni–Fe layered double hydroxide/graphene aerogel supercapacitor electrode material
Source: Royal Society of Chemistry journal article supplement (doi:10.1039/c6ra19495h), 2016-01-01
Supplement: c6ra19495h1.pdf [file c6ra19495h1.pdf]

**Supporting Information for**  
**“Low-cost and high-performance of a vertically grown 3D Ni-Fe**  
**layered double hydroxide/graphene aerogel supercapacitor electrode**  
**material”**

**Xiujiao Gao, Haipeng Lv, Zhihong Li, Qunjie Xu, Haimei Liu,**  
**Yonggang Wang, Yongyao Xia**

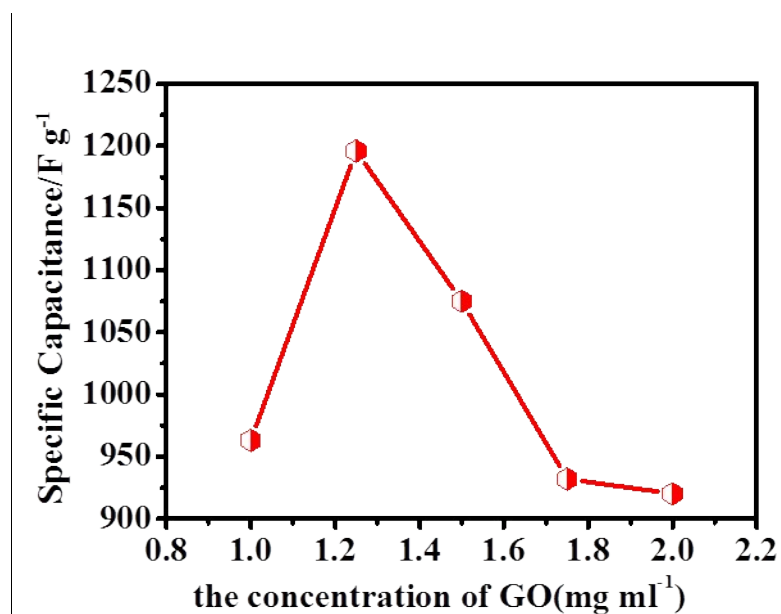

**Figure S1** The specific capacitance curve of sample with different ratio of GO in 1A g<sup>-1</sup>.

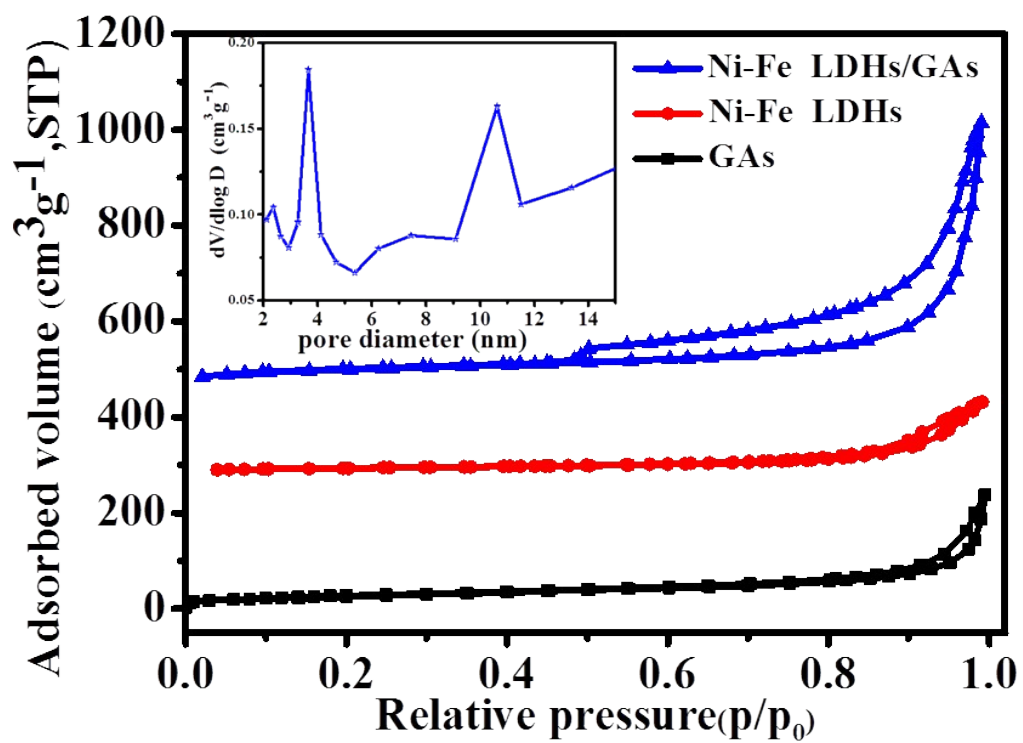

**Figure S2** The  $\text{N}_2$  adsorption-desorption isotherms for (a) 3D Ni-Fe LDH /GHA, (b) pure Ni-Fe LDH and (c) GAs ,the inset is the pore size distribution plot of the 3D Ni-Fe LDH /GHA.

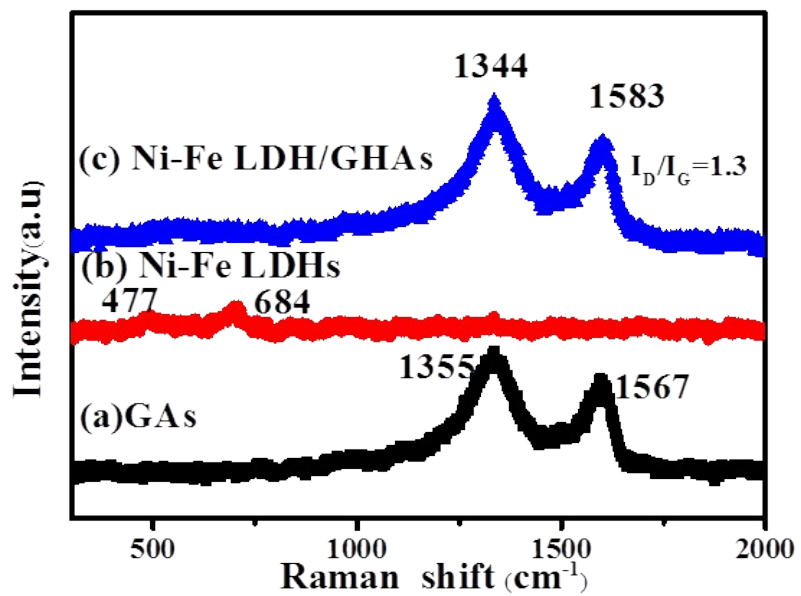

**Figure S3:** Raman spectra of (a) GAs, (b) pure Ni-Fe LDH and (c) 3D Ni-Fe LDH /GHA.

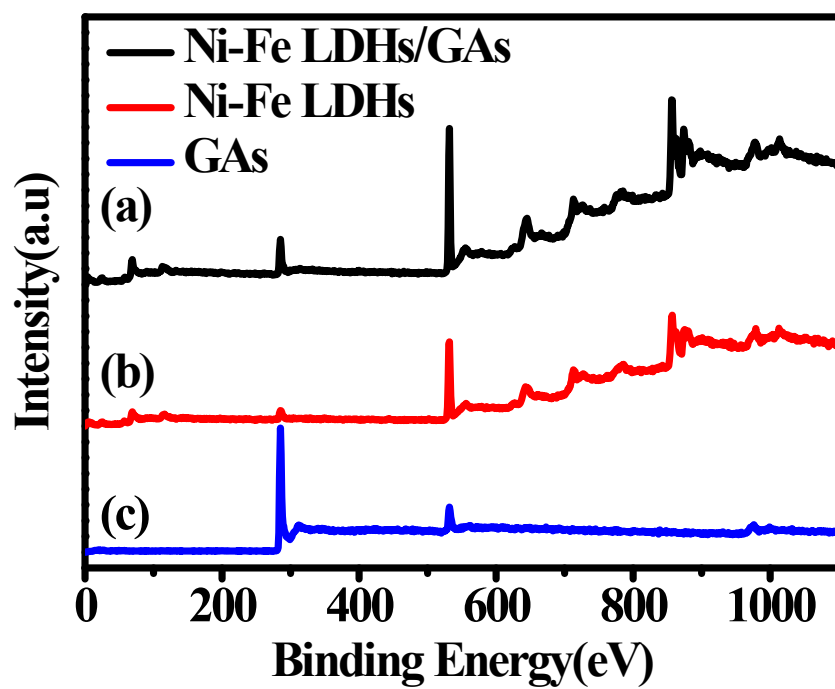

**Figure S4** XPS survey spectrum of (a) 3D Ni-Fe LDH /GHA, (b) pure Ni-Fe LDH and (c) GAs.

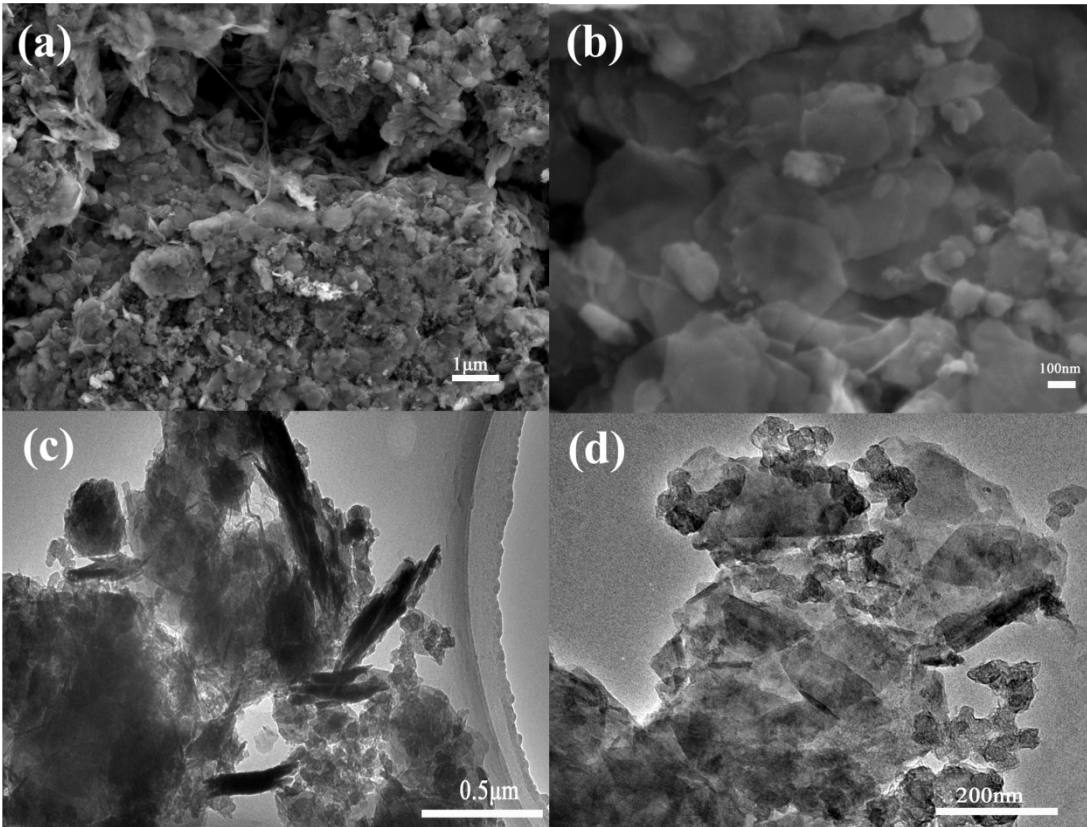

**Figure S5** (a, b) SEM and (c, d) TEM images of Ni-Fe LDHs /GHA electrodes after prolonged electrochemical cycles, revealing Ni-Fe LDHs remain well-confined within GA after cycling test. The black nanoparticles irregularly dispersed around the samples are carbon black, which widely be used as the conductive agent.

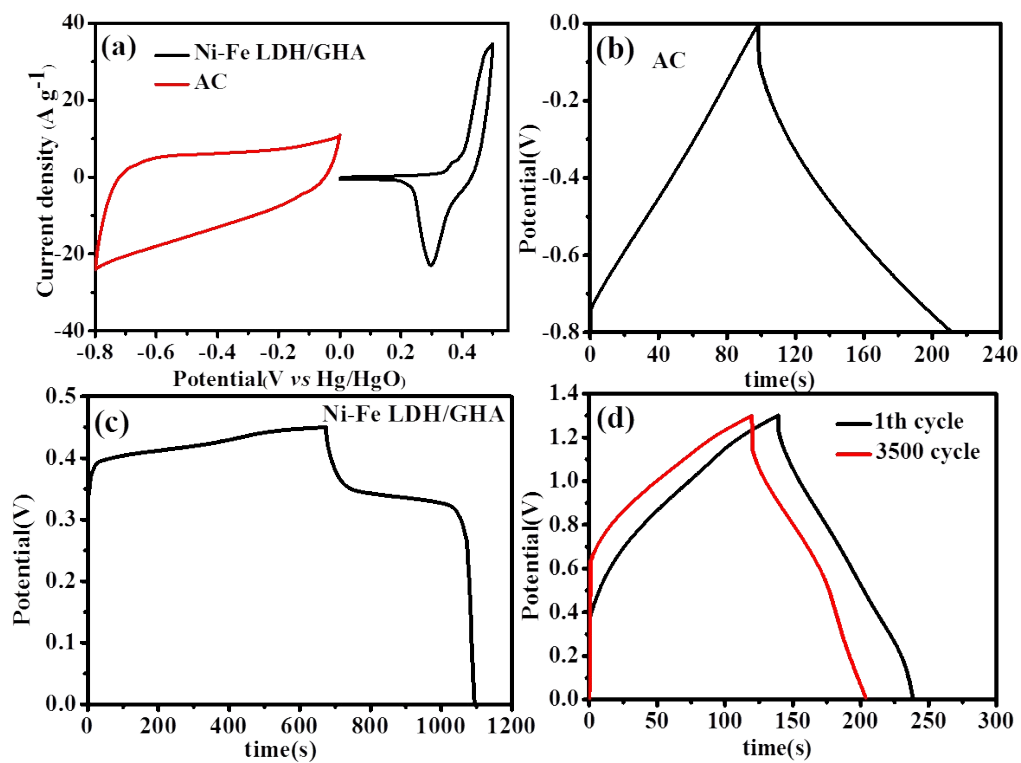

**Figure S6** (a) CV curves of AC and Ni-Fe LDHs /GHA in three-electrode, (b, c) GCD curves of AC and Ni-Fe LDH/GHA in three-electrode at 1A g<sup>-1</sup>, (d) Stability representing GCD curves of Ni-Fe LDH /GHA//AC asymmetric supercapacitors at 1 A g<sup>-1</sup>.

**Table S1.** Electrochemical properties of various LDHs, LDHs and graphene based composite materials.

| <b>Material</b>      | <b>Highest Specific Capacitance( F/g)</b> | <b>Rate capability</b>          | <b>reference</b> |
|----------------------|-------------------------------------------|---------------------------------|------------------|
| Ni-Al LDH/Ni foam    | 701 (10 mA cm <sup>2</sup> )              | 57.2% (40 mA cm <sup>-2</sup> ) | [S1]             |
| Co-Al LDH /graphene  | 1043 (1 A g <sup>-1</sup> )               | 72% (50 mA cm <sup>-2</sup> )   | [S2]             |
| Co-Al LDHs/Pt        | 734 (1 A g <sup>-1</sup> )                | 61% (25 A g <sup>-1</sup> )     | [S3]             |
| Co-Al LDH            | 772 (1 A g <sup>-1</sup> )                | 80% (25 A g <sup>-1</sup> )     | [S4]             |
| Co-Fe LDH            | 728 (1 A g <sup>-1</sup> )                | 84% (2A g <sup>-1</sup> )       | [S5]             |
| Ni-Co-Al LDH/RGO/CNT | 1188 (1 A g <sup>-1</sup> )               | 71% (10 A g <sup>-1</sup> )     | [S6]             |
| Ni-Fe LDH/GHA        | 1196(1 A g <sup>-1</sup> )                | 72% (10 A g <sup>-1</sup> )     | This work        |

**Table S2.** Comparison studies for the reported LDH-based asymmetric supercapacitors

| Positive materials// negative materials | Specific Capacitance ( F g <sup>-1</sup> ) | Energy density (Wh · kg <sup>-1</sup> ) | Power density (W · kg <sup>-1</sup> ) | Reference |
|-----------------------------------------|--------------------------------------------|-----------------------------------------|---------------------------------------|-----------|
| Co-Mn LDH//AC                           | 29.3                                       | 5.9                                     | 250                                   | [S7]      |
| NiCo-LDH //GOMC                         | 112                                        | 33.7                                    | 5400                                  | [S8]      |
| Ni-Al LDH/rGO//AC                       | 39.5                                       | 8.07                                    | 3420                                  | [S9]      |
| Co-Al LDH //AC                          | 96                                         | 44.8                                    | 8500                                  | [S10]     |
| Ni-Mn LDH/rGO//AC                       | 84.26                                      | 21.95                                   | 850                                   | [S11]     |
| Ni-Fe LDH/GHA//AC                       | 91.3                                       | 21.3                                    | 356                                   | This work |

**Reference**

- S1 J. Wang, Y. Song, Z. Li, Q. Liu, J. Zhou, X. Jing, M. Zhang and Z. Jiang, *Energ Fuels*, 2010, 24, 6463.
- S2 X. Wu, L. Jiang, C. Long, T. Wei and Z. Fan, *Adv. Funct. Mater.*, 2015, 25, 1648.
- S3 Z. Lu, W. Zhu, X. Lei, G. R. Williams, D. O'Hare, Z. Chang, X. Sun and X. Duan, *Nanoscale*, 2012, 4, 3640.
- S4 F. Yuan, Y. Ni, L. Zhang, S. Yuan and J. Wei, *J. Mater. Chem. A*, 2013, 1, 8438.
- S5 K. Ma, J. P. Cheng, J. Zhang, M. Li, F. Liu and X. Zhang, *Electrochim. Acta*, 2016, 198, 231.
- S6 C. Yu, J. Yang, C. Zhao, X. Fan, G. Wang, J. Qiu, *Nanoscale*, 2016, 6, 3097.
- S7 A. D. Jagdalea, G. Q. Guan, X. M. Li, X. L. Ma, X. G. Hao and A. Abudulaa, *J. Power Source*, 2016, 306, 526.
- S8 R. R. Li, Z. X. Hu, P. P. Cheng, S. S. Shou, W. D. Yu and D. S. Yuan, *Sci Rep.*, 2016, 6,



18737.

S9 X. Ge, C. Gu, Z. Yin, , X. Wang, J. Tu and J. Li, *Nano Energy*, 2016, 20, 185.

S10 X. Liu, A. Zhou, T. Pan, Y. Dou, M. Shao, J. Han, and M. Wei, *J. Mater. Chem. A*, 2016, 4, 8421.

S11 M. Lia, J. P. Chenga, J. Wang, F. Liu and X. B. Zhang, *Electrochim. Acta*, 2016, 206, 108.
